# Supplementary material
Source: PubMed Central journal article supplement (PMC3042244)
Supplement: NIHMS265663-supplement-01.pdf [file NIHMS265663-supplement-01.pdf]

## FOR ONLINE SUPPLEMENT

### Supplementary Table (1) and Supplementary Figures (3)

Supplementary Materials:

### Supplementary Table:

Supplementary Table (title): **Individual participant characteristics.**

|      | Age / gender    | Diagnosis     | Onset Age (y) | Remission Duration (mo) | Treatment / daily dose |
|------|-----------------|---------------|---------------|-------------------------|------------------------|
| 1    | 29 M            | MDD recurrent | 19            | 11                      | Sertraline 200 mg      |
| 2    | 47 F            | MDD recurrent | 25            | 28                      | Escitalopram 10 mg     |
| 3    | 49 F            | MDD recurrent | 29            | 11                      | Paroxetine 37.5 mg     |
| 4    | 44 M            | MDD recurrent | 28            | 22                      | Escitalopram 10 mg     |
| 5    | 42 F            | MDD recurrent | 38            | 3                       | Escitalopram 10 mg     |
| 6    | 28 M            | MDD recurrent | 15            | 18                      | Escitalopram 15 mg     |
| 7    | 35 F            | MDD recurrent | 19            | 6                       | Sertraline 100 mg      |
| 8    | 24 M            | MDD recurrent | 10            | 7                       | Fluoxetine 80 mg       |
| 9    | 28 M            | MDD recurrent | 15            | 2                       | Citalopram 30 mg       |
| 10   | 21 F            | MDD recurrent | 16            | 2                       | Escitalopram 20 mg     |
| 11   | 48 F            | MDD recurrent | 32            | 2                       | Sertraline 50 mg       |
| Mean | 35.9 ,<br>F 55% |               | 22.4          | 10.2                    |                        |

Supplementary Table (caption): Participant demographic and clinical characteristics. MDD = major depressive disorder.

## Supplementary Figure Legends

Supplementary Figure 1.

Spectral power for all regions and frequency bands. \* Significant ( $p < 0.05$ ) for ATD compared to control test, by Wilcoxon Signed Ranks ( $n = 11$ ). For PRN (pontine raphé nucleus),  $P = 0.004$  (significant with post correction alpha  $p < .0125$ ). LAT = left anterior thalamus; RAT = right anterior thalamus; LAC = left anterior cingulate; RAC = right anterior cingulate; PRN = pontine raphé nucleus; LCD = left caudate head; RCD = right caudate head; LHB = left habenula; RHB = right habenula.

Supplementary Figure 2.

. Typical region of interest maps for (a) Pontine Raphé; (b) Caudate Head and Anterior Cingulate; (c) Anterior Thalamus (from one analyst); (d) Anterior Thalamus (from a second analyst); (e) Habenula.

Supplementary Figure 3.

ATD condition correlation between spectral power and thalamo-raphé connectivity. Identical slopes for the right and left thalami are shown.  $r = 0.67$ .

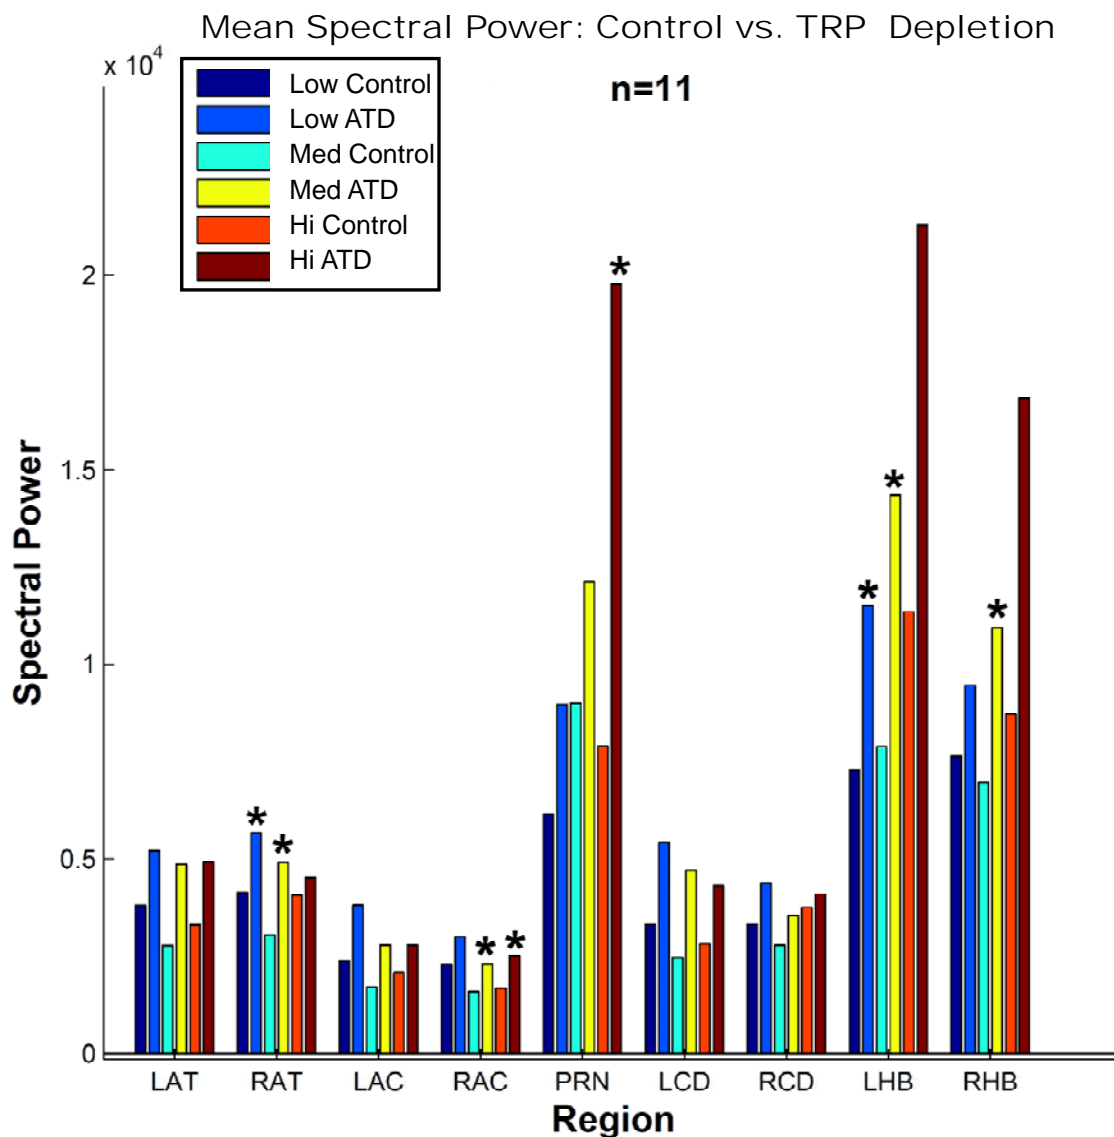

Supplementary Figure 1. Spectral power for all regions and frequency bands. \* Significant ( $p < 0.05$ ) for ATD compared to control test, by Wilcoxon Signed Ranks ( $n = 11$ ). For PRN (raphé),  $P = 0.004$ . LAT = left anterior thalamus; RAT = right anterior thalamus; LAC = left anterior cingulate; RAC = right anterior cingulate; PRN = pontine raphé; LCD = left caudate head; RCD = right caudate head; LHB = left habenula; RHB = right habenula.

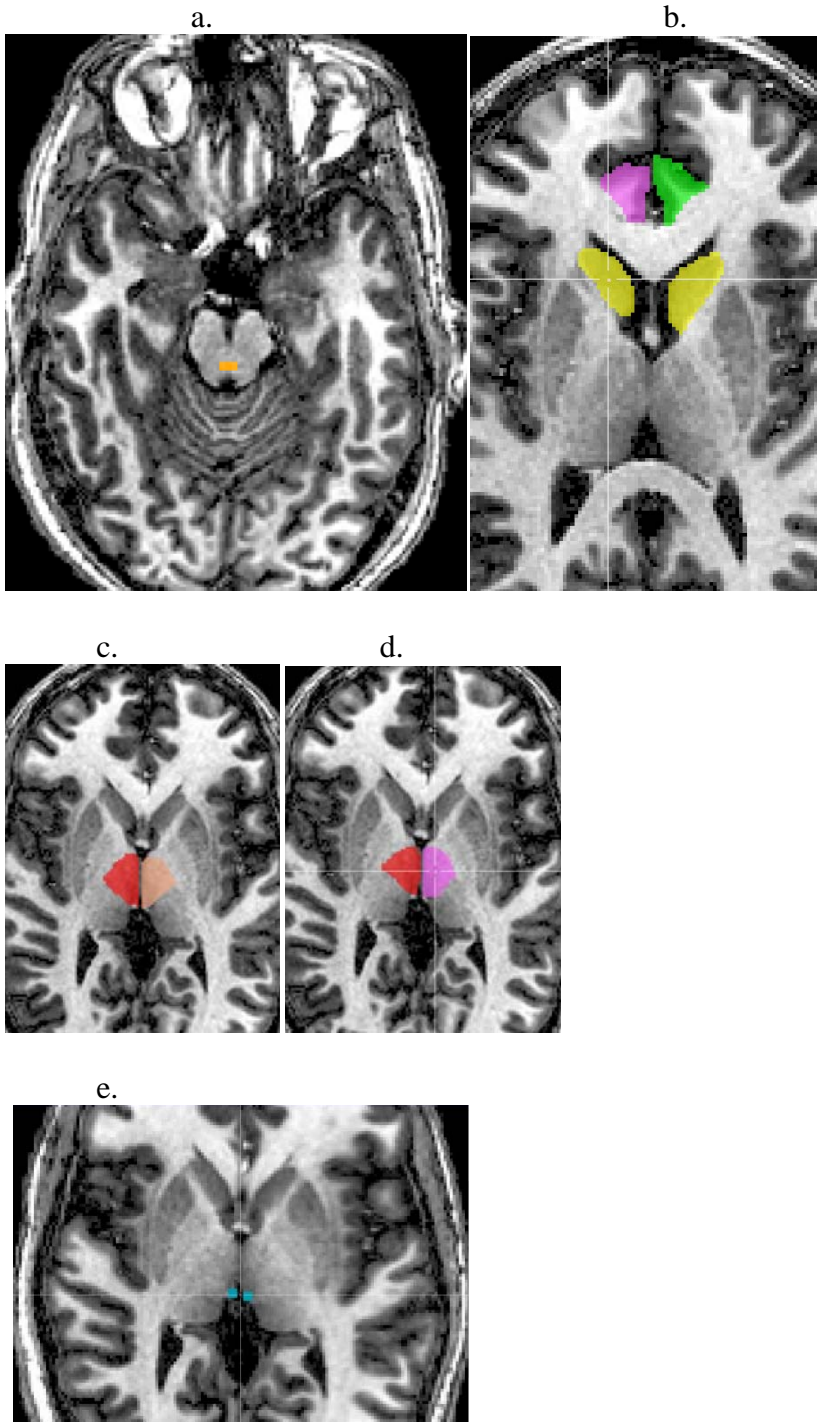

Supplementary Figure 2. Typical region of interest maps for (a) Pontine Raphé; (b) Caudate Head and Anterior Cingulate; (c) Anterior Thalamus (from one analyst); (d) Anterior Thalamus (from a second analyst); (e) Habenula.

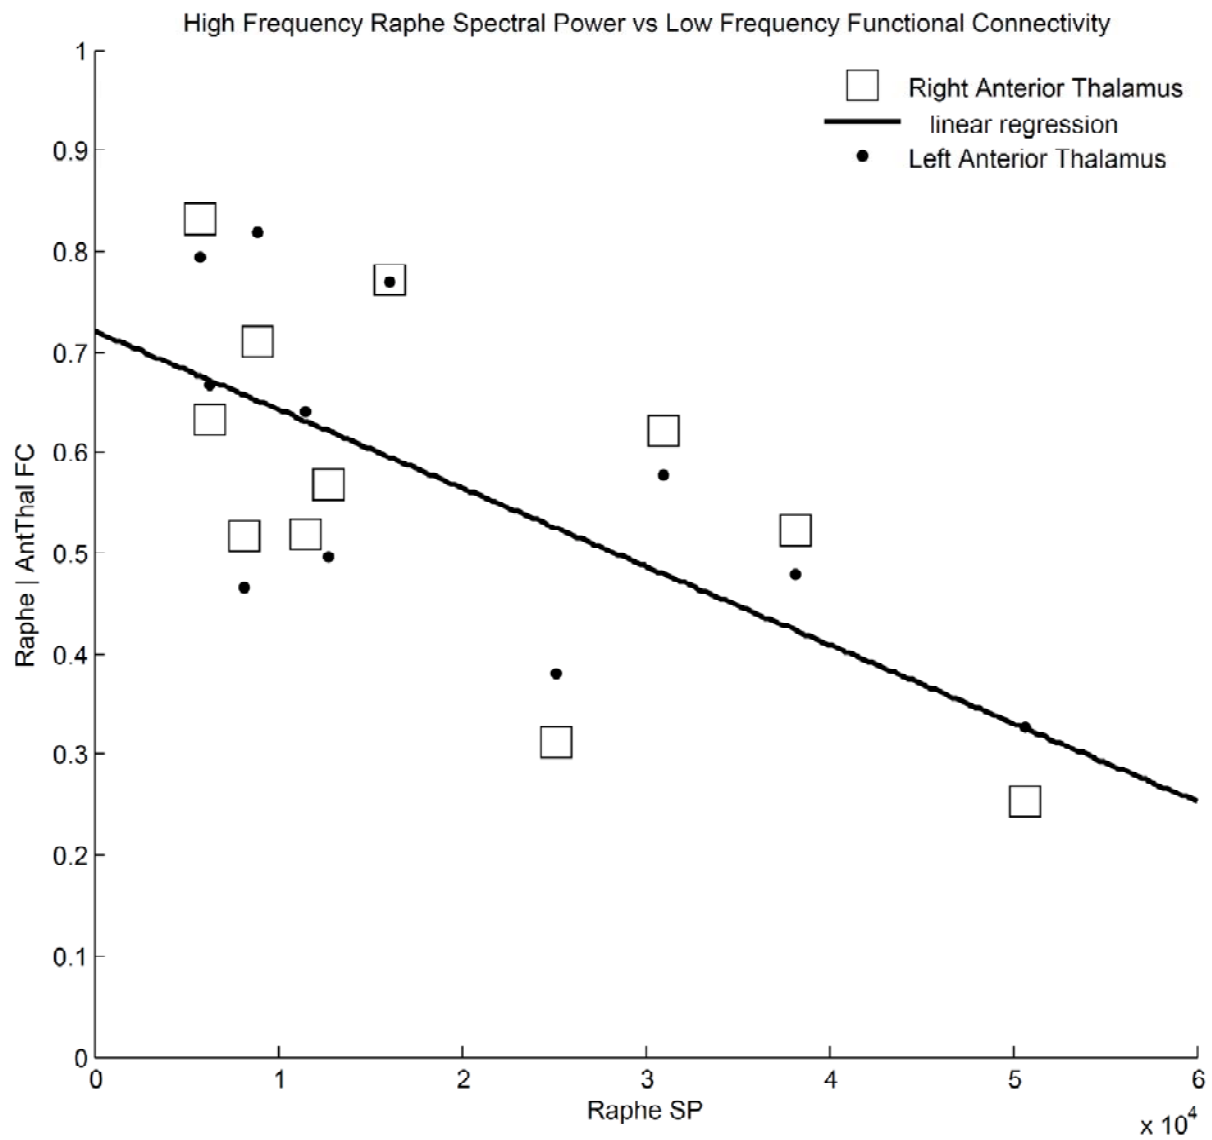

Supplementary Figure 3. ATD condition correlation between spectral power and thalamo-raphé connectivity. Virtually identical slopes for the right and left thalami are shown,  $r = 0.67$ .
